# Supplementary material for: Polyubiquitination and proteasomal turnover controls the anti-apoptotic activity of Bcl-B
Source: PubMed Central journal article supplement — Oncogene. 2013 Apr 8;32(48):5439–48. doi: 10.1038/onc.2013.99 (PMC3898306; doi:10.1038/onc.2013.99), 2013-04-08
Supplement: onc201399x1.pdf [file onc201399x1.pdf]

# Supplementary Information

Figure S1

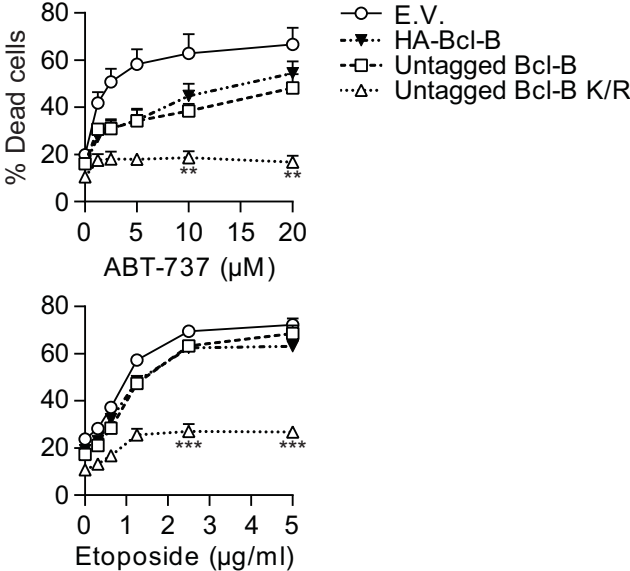

**Figure S1. HA-tagging of Bcl-B does not impact on its anti-apoptotic capacity.** J16 cell lines stably expressing empty vector (EV), HA-tagged WT Bcl-B, untagged WT or K/R mutant Bcl-B were treated side-by-side with ABT-737 or etoposide, at the indicated dose ranges. After 24 h, dead cells were identified by flow cytometric analysis of PI uptake. Data represent mean + SD from three independent experiments. Asterisks indicate statistically significant difference (Student's *t*-test; \*P<0.05, \*\*P<0.01, \*\*\*P<0.001).
